# Supplementary material for: Compact automated culture machine for human induced pluripotent stem cell maintenance and differentiation
Source: PubMed Central journal article supplement (PMC9744792; doi:10.3389/fbioe.2022.1074990), 2022-11-29

# Supplementary Figure 1

(A)

**New version: x-y-z-axes-rail-system**

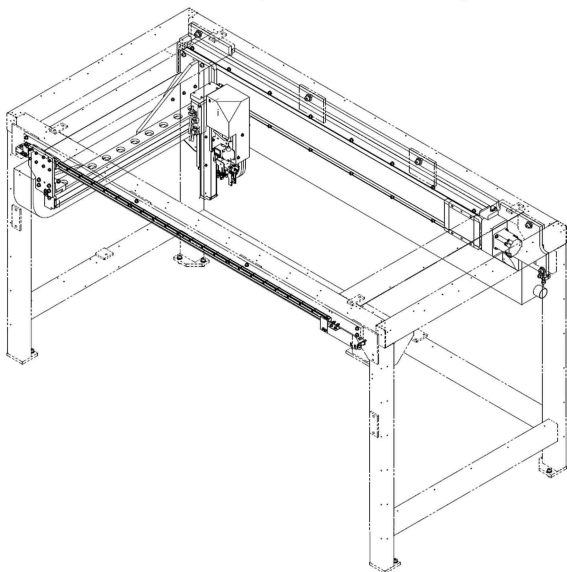

(B)

**Old version: 6-axes articulated-robotic arm**

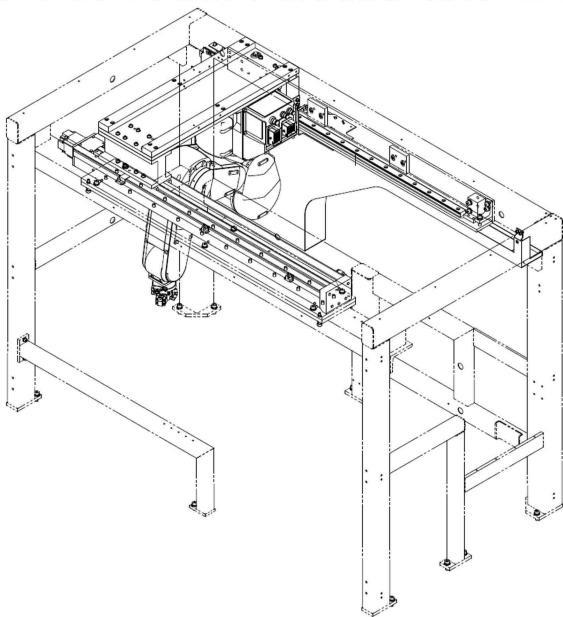

Supplement: Image1.pdf [file Image1.pdf]
