# Supplementary material for: Compact automated culture machine for human induced pluripotent stem cell maintenance and differentiation
Source: PubMed Central journal article supplement (PMC9744792; doi:10.3389/fbioe.2022.1074990), 2022-11-29

## Supplementary Figure 2

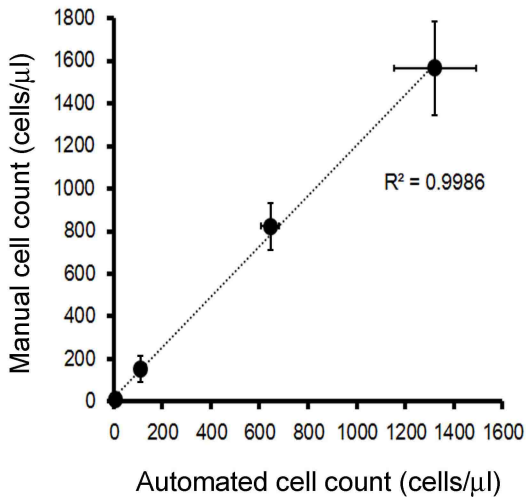

Supplement: Image2.pdf [file Image2.pdf]
