# Supplementary material for: Compact automated culture machine for human induced pluripotent stem cell maintenance and differentiation
Source: PubMed Central journal article supplement (PMC9744792; doi:10.3389/fbioe.2022.1074990), 2022-11-29

# Supplementary Figure 3

(A)

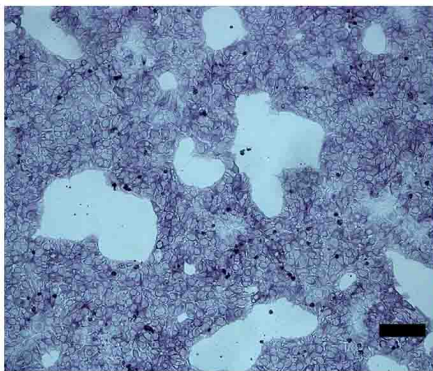

(B)

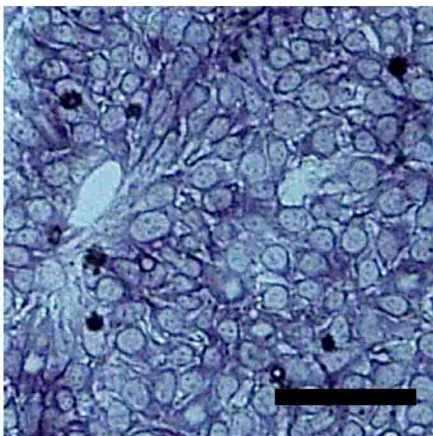

Supplement: Image3.pdf [file Image3.pdf]
