# Supplementary material for: Compact automated culture machine for human induced pluripotent stem cell maintenance and differentiation
Source: PubMed Central journal article supplement (PMC9744792; doi:10.3389/fbioe.2022.1074990), 2022-11-29
Supplement: Table1.pdf [file Table1.pdf]

## Supplementary Table S1

| Target cell types | Antigen Name                 | Host   | Clonality  | Manufacturer      | I.D.    | Dilution |
|-------------------|------------------------------|--------|------------|-------------------|---------|----------|
| iPSC              | Oct3/4                       | Mouse  | monoclonal | BD                | 611202  | 1:100    |
|                   | SSEA-4                       | Mouse  | monoclonal | Millipore         | MAB4304 | 1:100    |
|                   | TRA 1-81                     | Mouse  | monoclonal | Millipore         | MAB4381 | 1:100    |
| Cardiomyocytes    | TnT                          | Rabbit | monoclonal | Abcam             | ab92546 | 1:100    |
|                   | Actinin                      | Mouse  | monoclonal | Abcam             | ab9465  | 1:100    |
| Hepatocytes       | Albumin                      | Rabbit | polyclonal | Dako              | A0001   | 1:100    |
|                   | HNF-4A                       | Goat   | polyclonal | Santacruz         | 6556    | 1:100    |
| Neuronal cells    | Nestin                       | Mouse  | monoclonal | Santacruz         | 23927   | 1:100    |
|                   | $\beta$ III Tubulin          | Mouse  | monoclonal | Promega           | G712A   | 1:100    |
|                   | Neurofilament                | Rabbit | polyclonal | Chemicon          | AB1987  | 1:100    |
| Keratinocytes     | Keratin 1                    | Mouse  | monoclonal | Santacruz         | 376224  | 1:100    |
|                   | Keratin 10                   | Rabbit | polyclonal | BioLegend         | 19054   | 1:100    |
|                   |                              |        |            |                   |         |          |
|                   | Product name                 | host   | clonality  | Manufacturer      | I.D.    | Dilution |
| 2nd Antibodies    | mouse IgG(H+L) AlexaFluo488  | Donkey | polyclonal | Thermo Scientific | A21202  | 1:300    |
|                   | rabbit IgG(H+L) AlexaFluo488 | Donkey | polyclonal | Thermo Scientific | A21206  | 1:300    |
|                   | rabbit IgG(H+L) AlexaFluo546 | Donkey | polyclonal | Thermo Scientific | A10040  | 1:300    |
|                   | goat IgG(H+L) AlexaFluo546   | Donkey | polyclonal | Thermo Scientific | A11056  | 1:300    |
