# Supplementary material for: Compact automated culture machine for human induced pluripotent stem cell maintenance and differentiation
Source: PubMed Central journal article supplement (PMC9744792; doi:10.3389/fbioe.2022.1074990), 2022-11-29
Supplement: Table2.pdf [file Table2.pdf]

**Supplementary Table S2**

| Task                     | Human operator |         |        | Automated machine                                                   |             |                          |             |       |       |
|--------------------------|----------------|---------|--------|---------------------------------------------------------------------|-------------|--------------------------|-------------|-------|-------|
|                          | Beginner       | Trained | Expert | Process                                                             | Old version | New version (this study) | Time saving |       |       |
| <b>Preparation</b>       | 5.5            | 2.1     | 1      | dispense PBS in to three dishes                                     | 12.56       | 54.12                    | 11.59       | 44    | 10.12 |
|                          |                |         |        | preparation of culture medium for three dishes                      | 9.22        |                          | 8.16        |       |       |
|                          |                |         |        | taking out dish from incubator                                      | 4.19        |                          | 3.36        |       |       |
|                          |                |         |        | wash and exchange medium                                            | 22.1        |                          | 15.52       |       |       |
|                          |                |         |        | transfer the dish to incubator                                      | 3.05        |                          | 2.43        |       |       |
|                          |                |         |        | discard the used tubes                                              | 2.21        |                          | 1.34        |       |       |
| <b>Passage</b>           | 50.5           | 34.5    | 27.2   | dispense PBS                                                        | 4.25        | 59.58                    | 3.41        | 50.68 | 8.9   |
|                          |                |         |        | preparation of mediums for three dishes                             | 15.38       |                          | 13.46       |       |       |
|                          |                |         |        | taking out dish from incubator                                      | 1.08        |                          | 1.1         |       |       |
|                          |                |         |        | transfer the dish to incubator                                      | 3.07        |                          | 2.4         |       |       |
|                          |                |         |        | taking out dish from incubator                                      | 1.08        |                          | 1.1         |       |       |
|                          |                |         |        | detachment of the cells, and preparation of dispersed cell solution | 19.02       |                          | 16.52       |       |       |
|                          |                |         |        | seeding                                                             | 10.3        |                          | 8.26        |       |       |
|                          |                |         |        | transfer the dish to incubator                                      | 3.07        |                          | 2.4         |       |       |
| discard dishes and tubes | 2.33           | 2.03    |        |                                                                     |             |                          |             |       |       |
| <b>Cell count</b>        | 9.2            | 7       | 4.1    | No function                                                         |             | 3.8                      | 3.8         | -     |       |

(minutes)
